# Supplementary material for: Relationship between the Polymer Blend Using Chitosan, Polyethylene Glycol, Polyvinyl Alcohol, Polyvinylpyrrolidone, and Antimicrobial Activities against Staphylococcus aureus
Source: MDPI journal article supplement (doi:10.3390/pharmaceutics15102453), 2023-10-13
Supplement: s1 [file pharmaceutics-2622032-supplementary.pdf › pharmaceutics-2622032-supplementary.pdf]

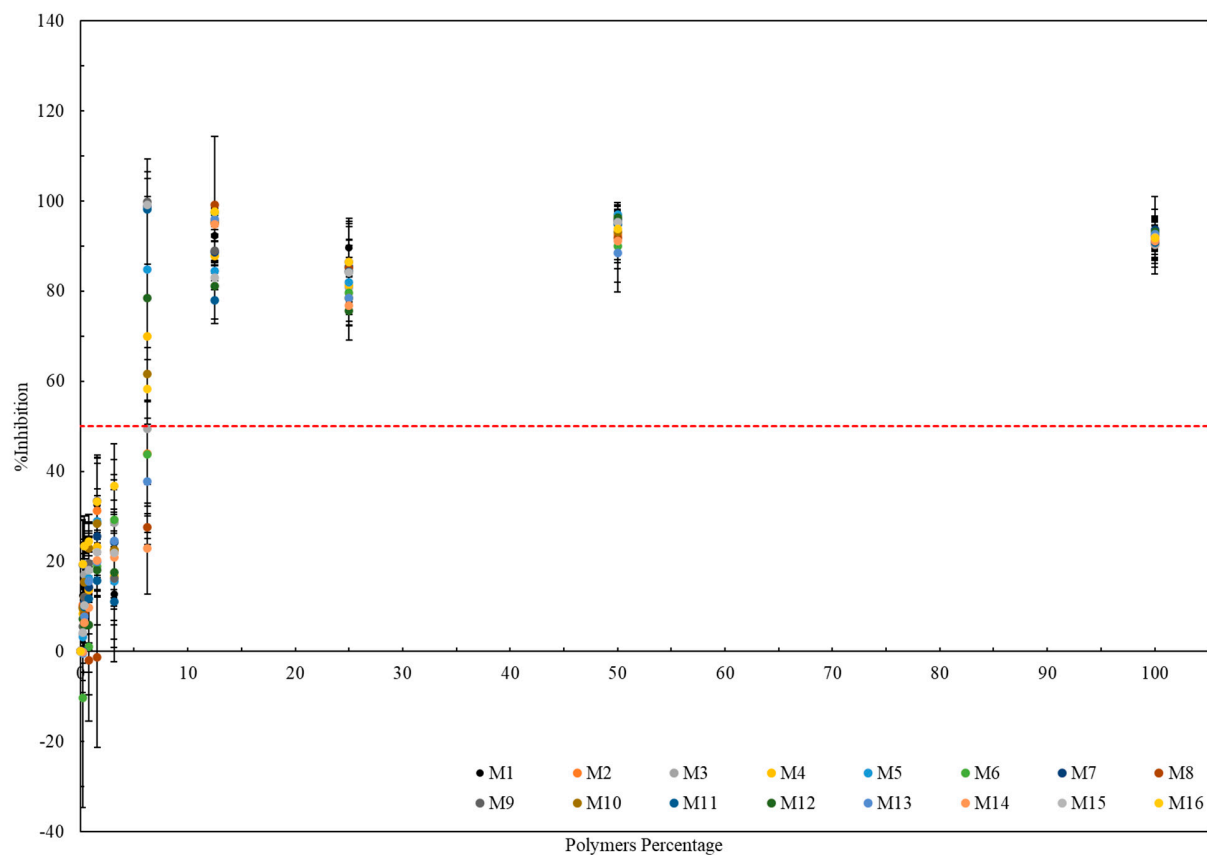

Figure S1. Inhibition percentage v. polymers percentage.

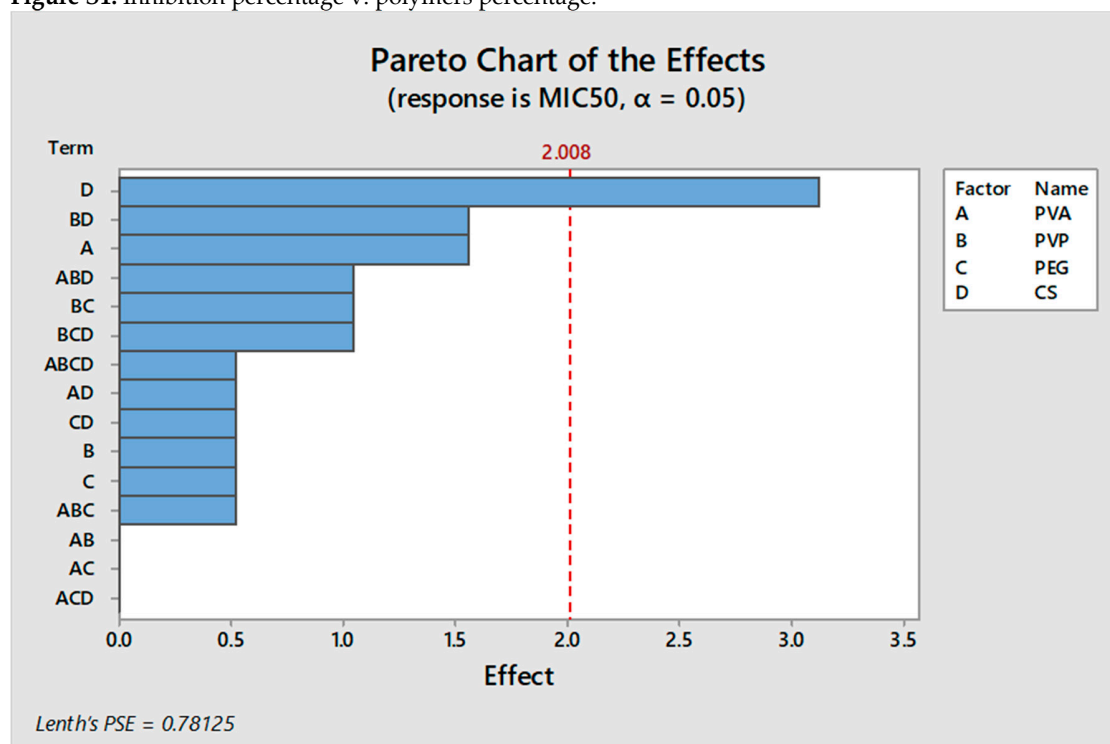

Figure S2. The Pareto chart of the effects of M1-M16 on MIC<sub>50</sub>.

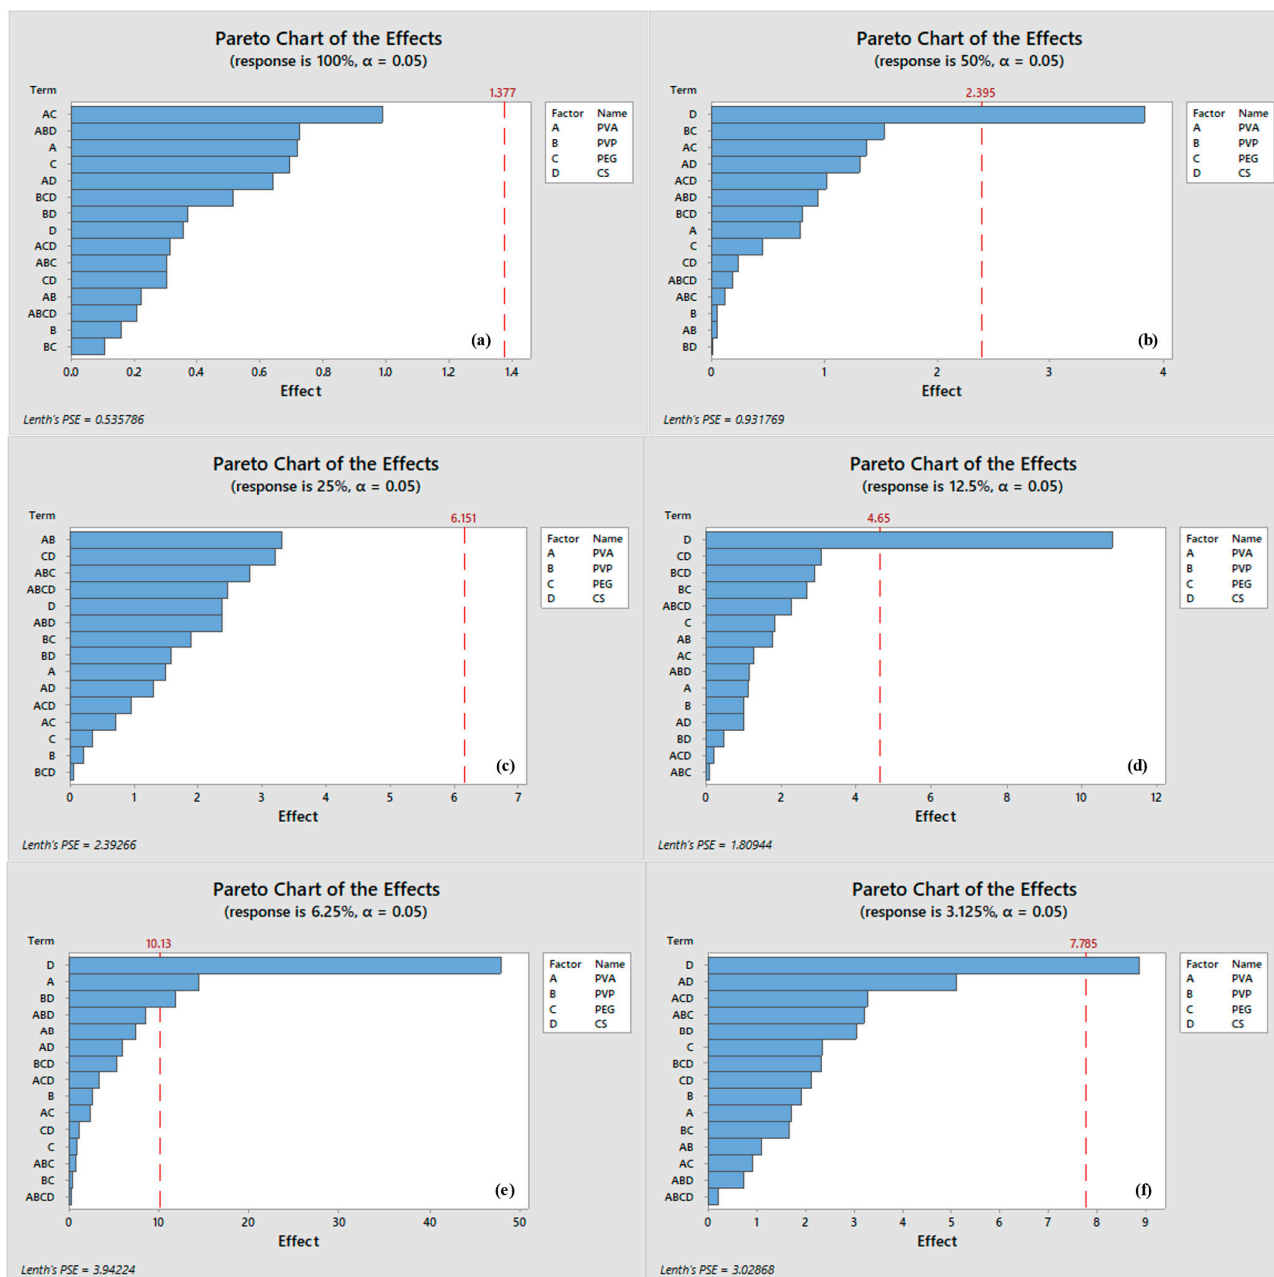

**Figure S3.** The Pareto chart of the effects of M1-M16 on inhibition percentage when the polymer blends with polymer percentage of (a) 100%, (b) 50%, (c) 25%, (d) 12.5%, (e) 6.25%, (f) 3.125%.

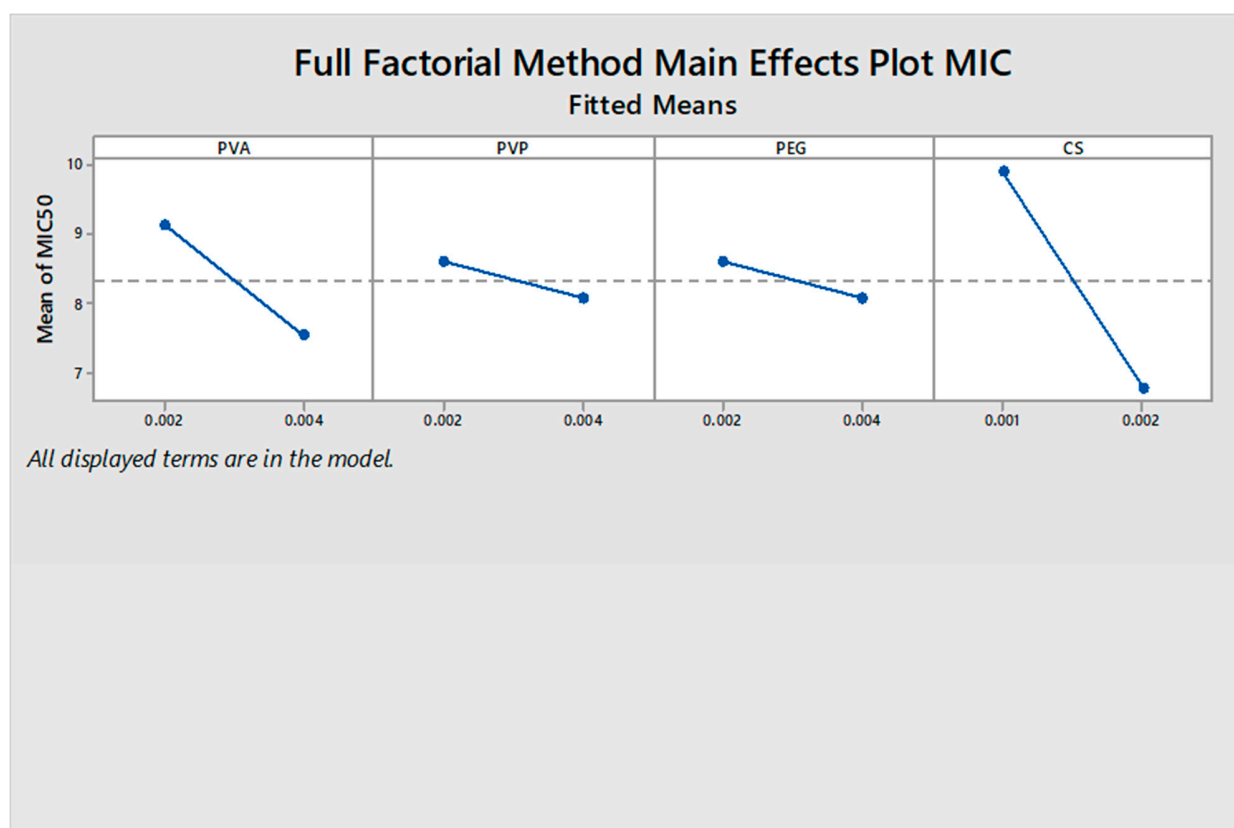

**Figure S4.** Main effect plots for means on MIC<sub>50</sub> for M1-M16 using 2-level factorial design methods.

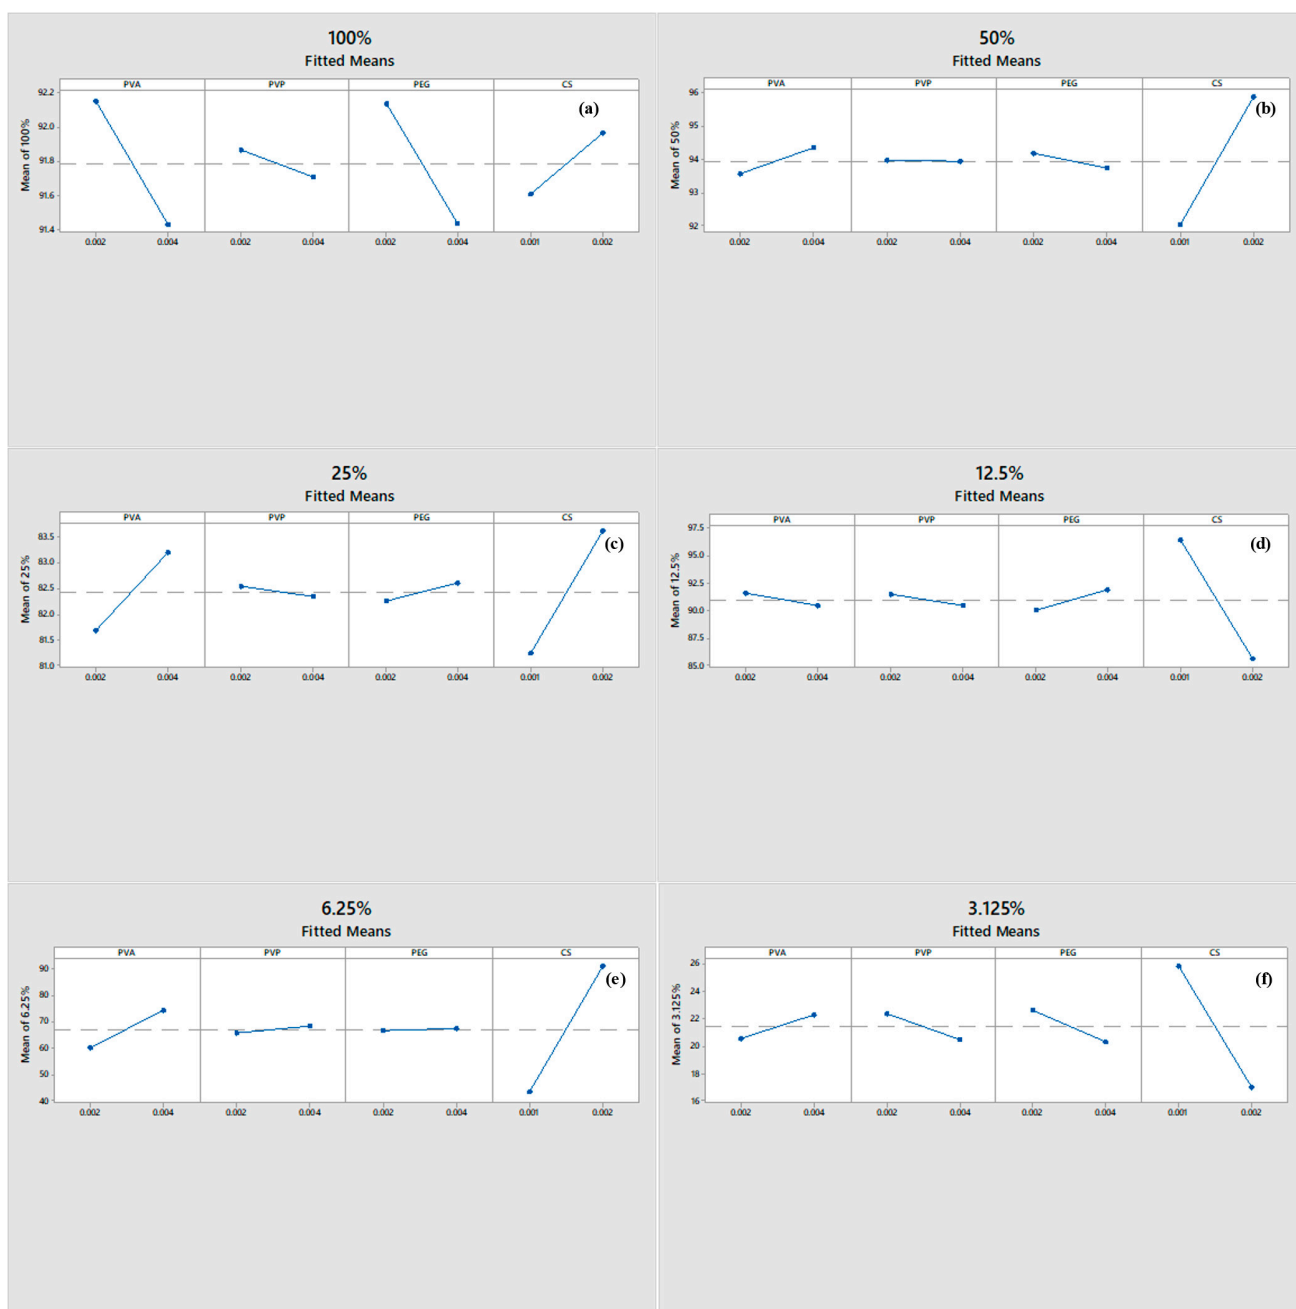

**Figure S5.** Main effect plots for means on inhibition percentage for M1-M16 polymer percentage of (a) 100%, (b) 50%, (c) 25%, (d) 12.5%, (e) 6.25%, (f) 3.125% using by 2-level factorial design methods (left to right).

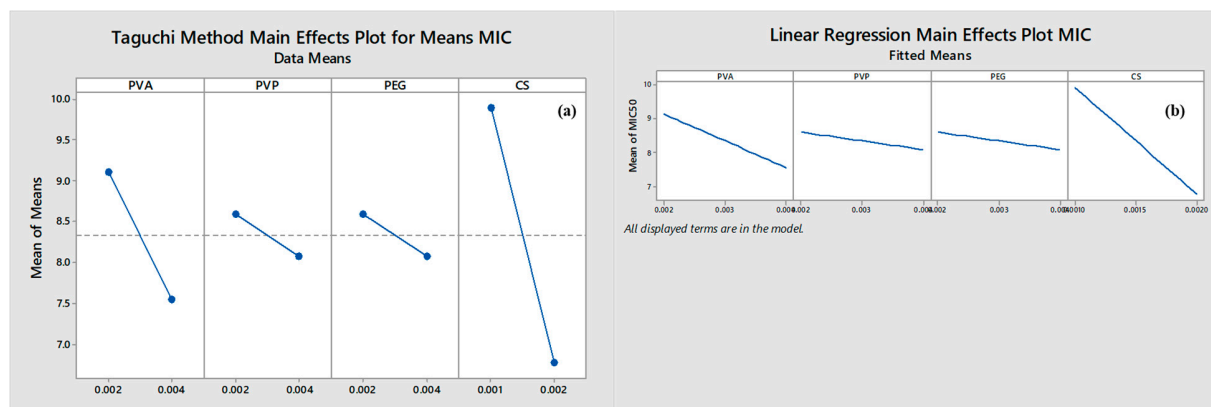

**Figure S6.** Main effect plots on MIC<sub>50</sub> for M1-M16 using by (a) Taguchi methods main effect plots for means, (b) Linear regression.

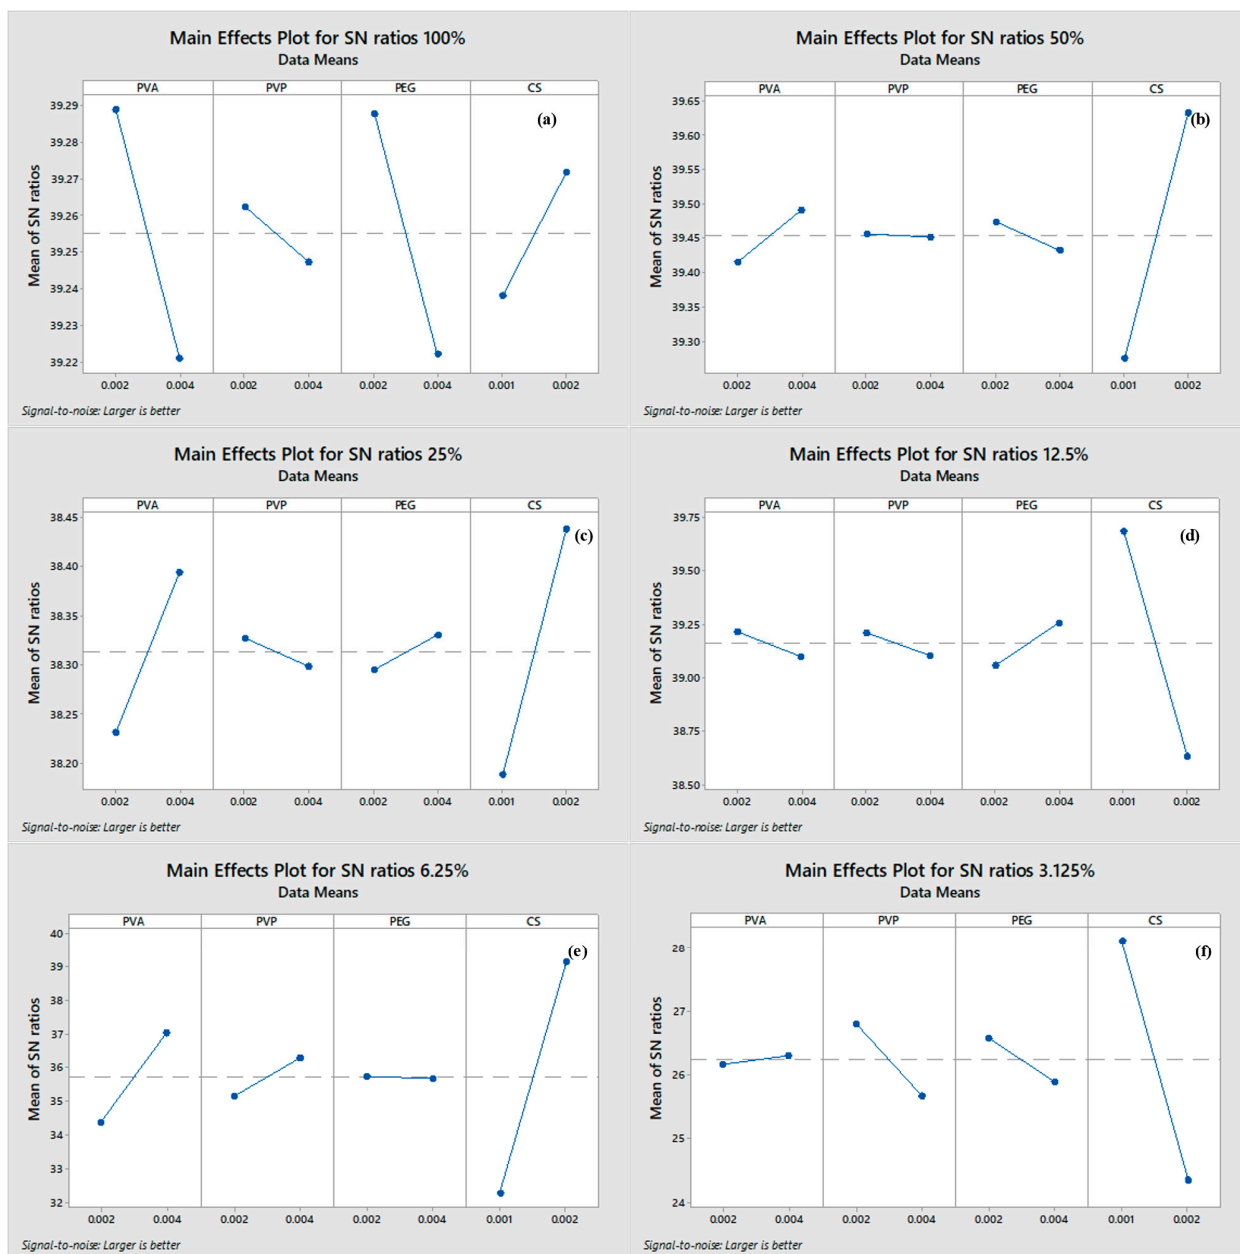

**Figure S7.** Main effect plots for S/N ratios on inhibition percentage for M1- polymer percentage of (a) 100%, (b) 50%, (c) 25%, (d) 12.5%, (e) 6.25%, (f) 3.125% using Taguchi methods (left to right).



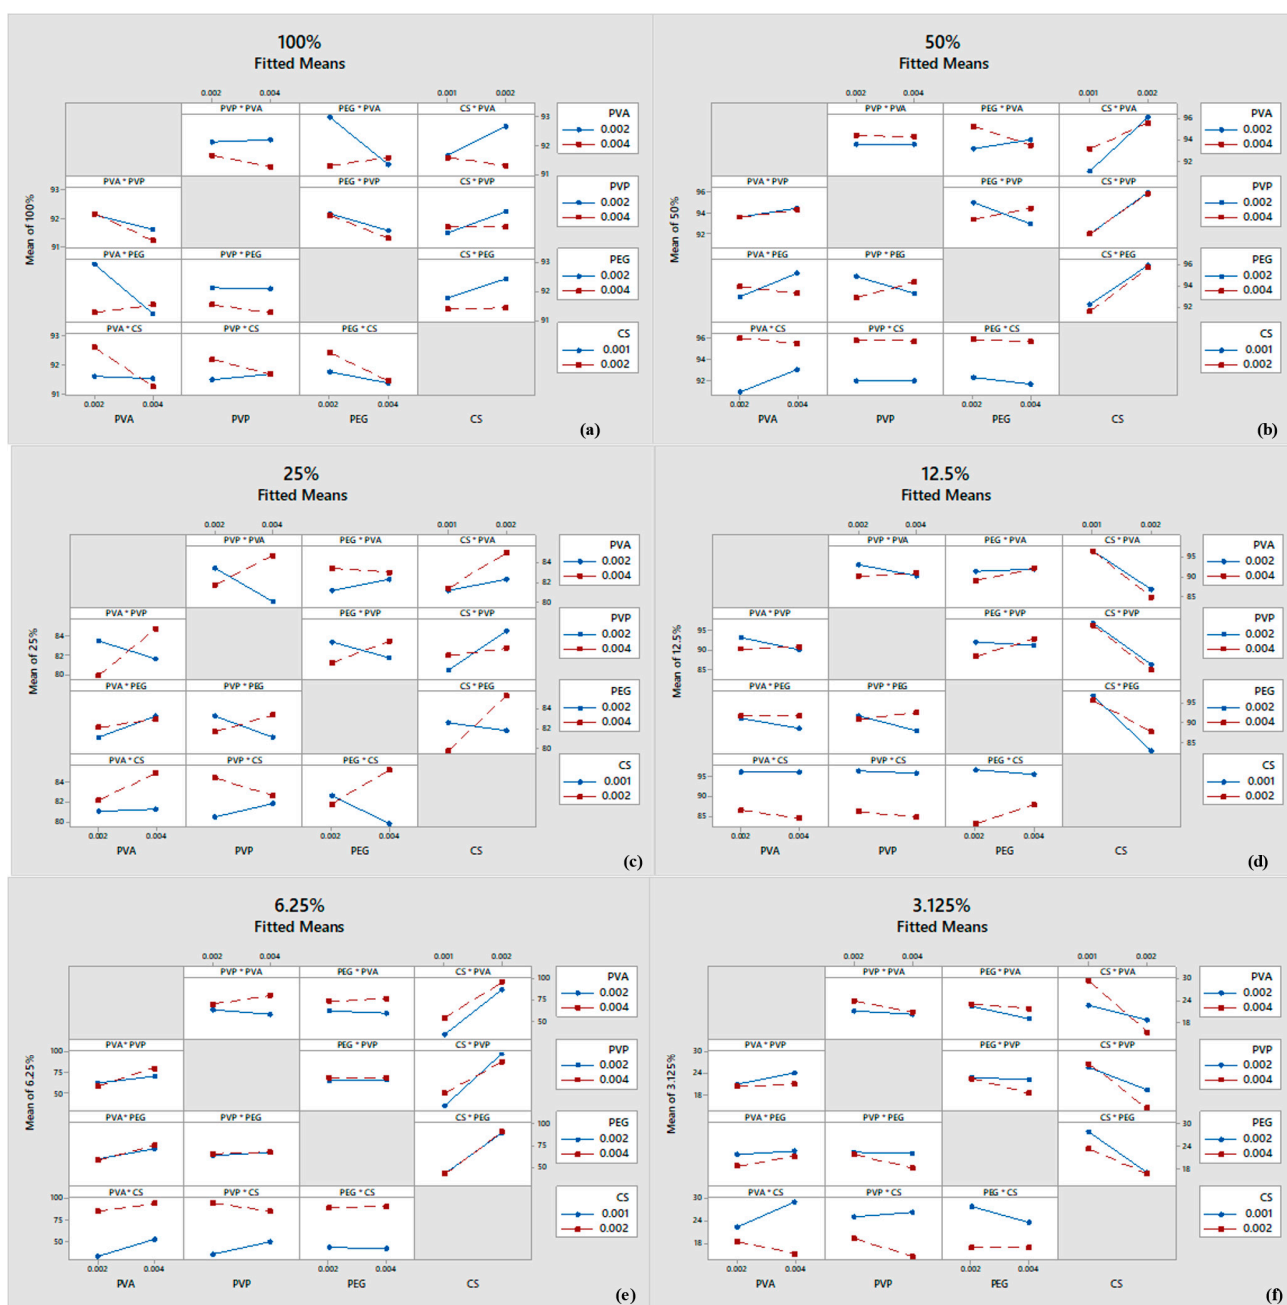

**Figure S9.** Interaction plots for means on inhibition percentage for M1- M16 with polymer percentage of (a) 100%, (b) 50%, (c) 25%, (d) 12.5%, (e) 6.25%, (f) 3.125% using by 2-level factorial design methods (left to right).



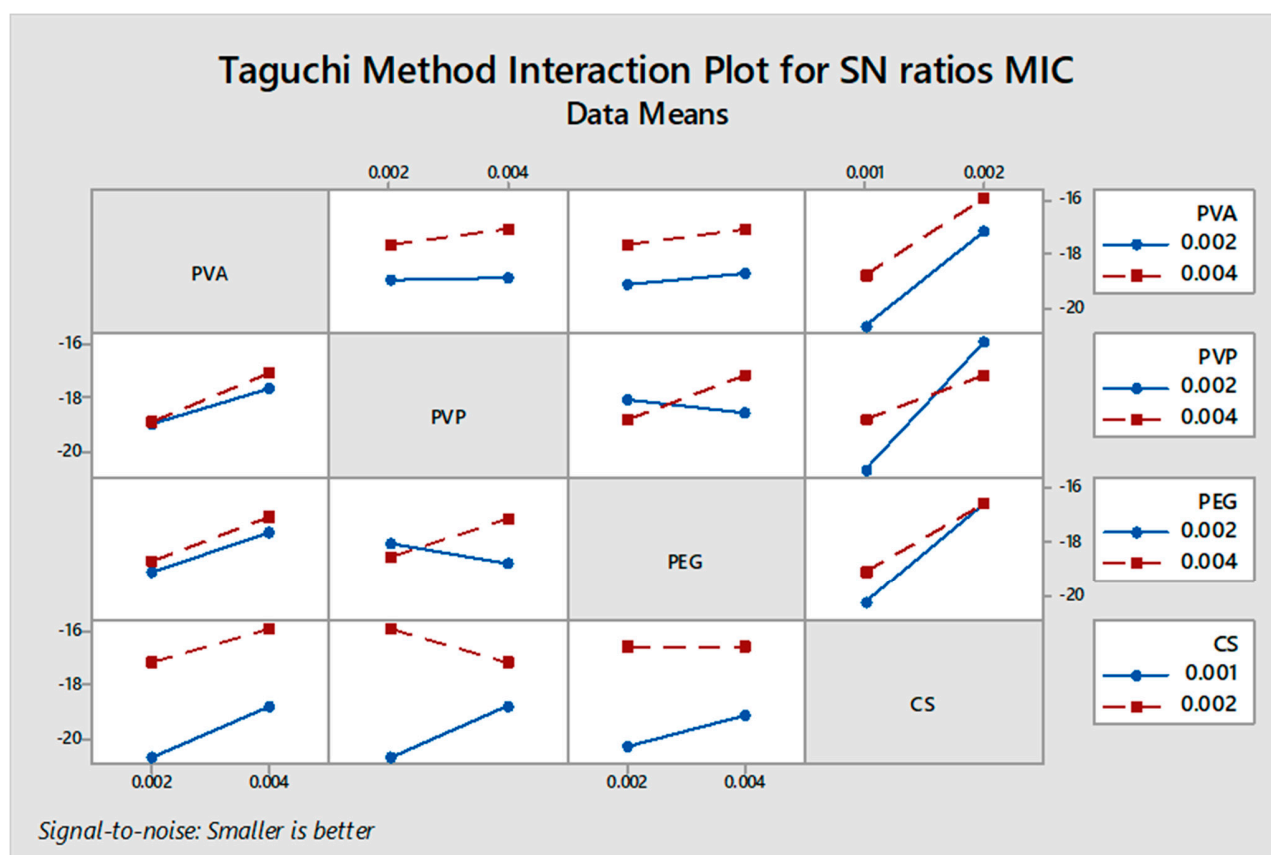

**Figure S10.** Interaction plots for means on MIC<sub>50</sub> for M1-M16 using Taguchi methods for S/N ratios.

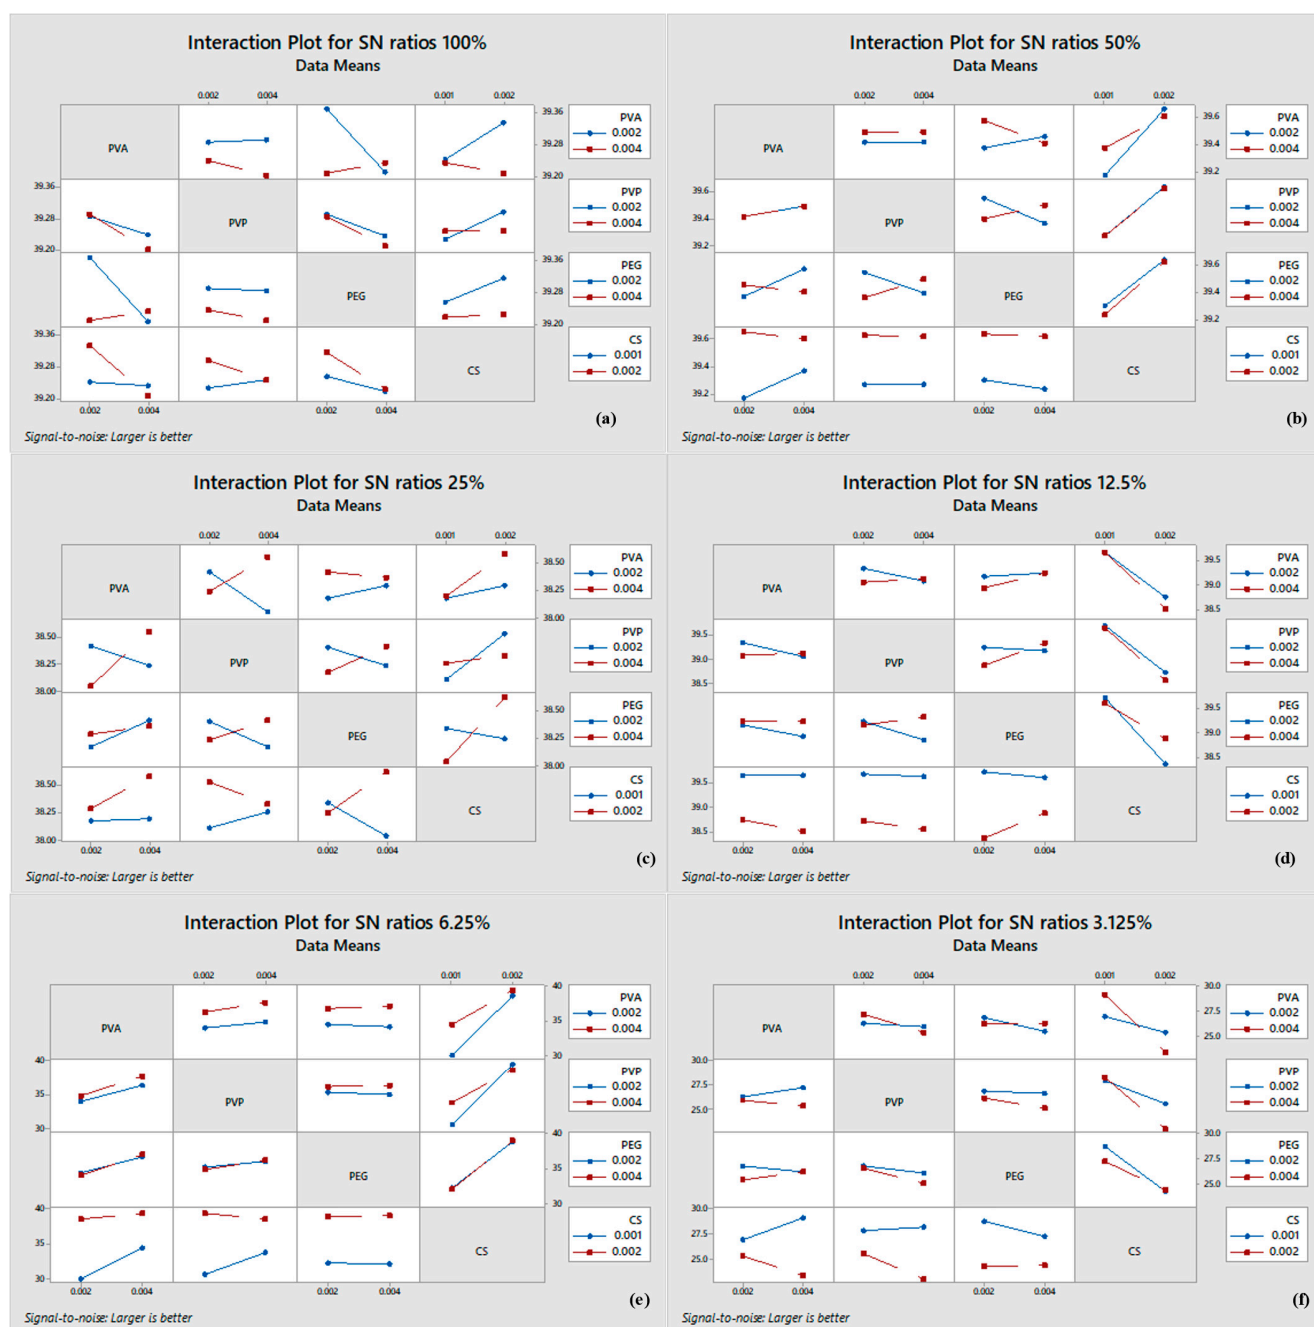

**Figure S11.** Interaction plots for S/N ratios on inhibition percentage for M1-M16 with polymer percentage of (a) 100%, (b) 50%, (c) 25%, (d) 12.5%, (e) 6.25%, (f) 3.125% using by Taguchi methods (left to right).

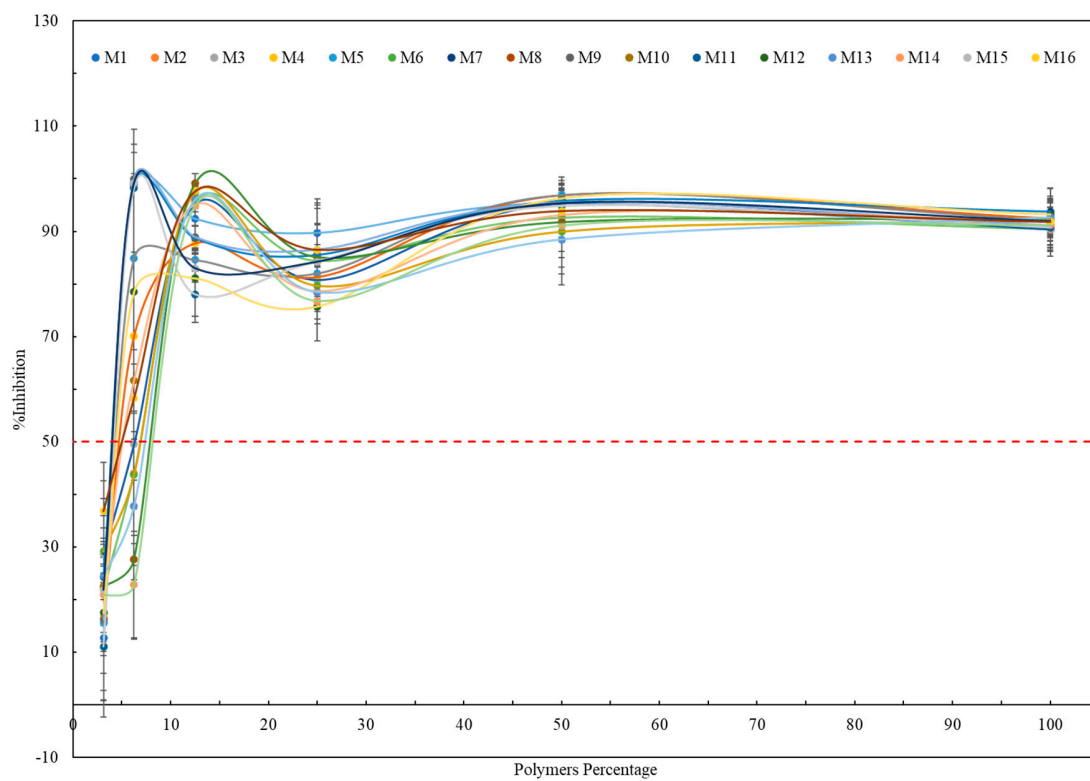

**Figure S12.** The relationship between inhibition percentage and polymers concentration with experimental fittings.

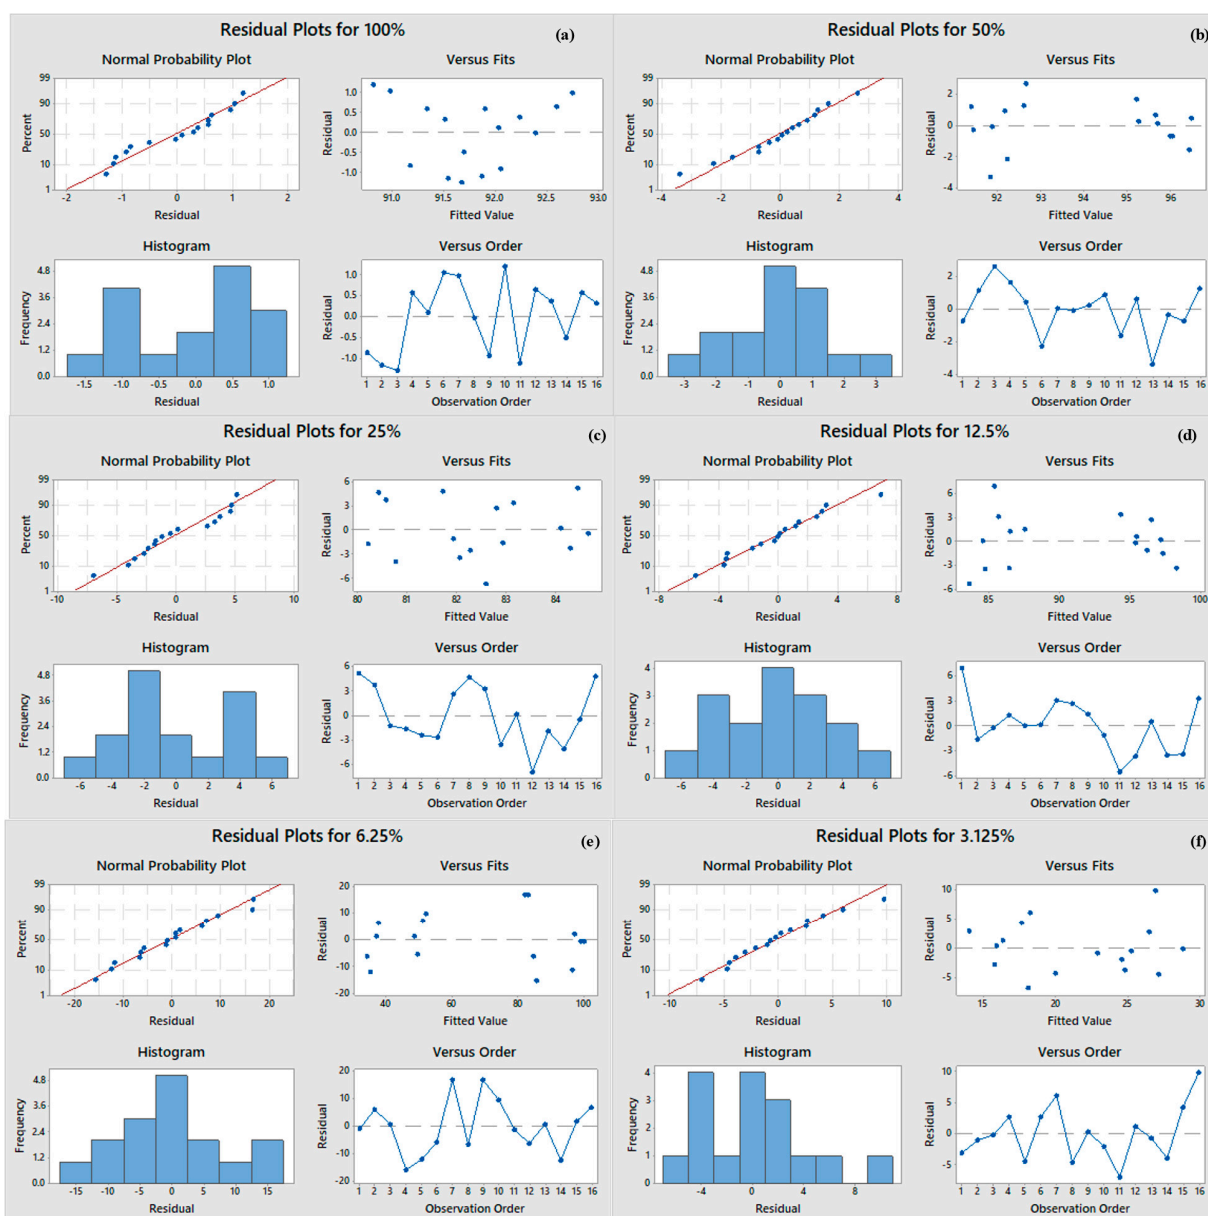

**Figure S13.** Residual plots of the linear regression of polymer blend concentration and inhibition percentage at different polymers percentage (a) 100%, (b) 50%, (c) 25%, (d) 12.5%, (e) 6.25%, (f) 3.125% (left to right).

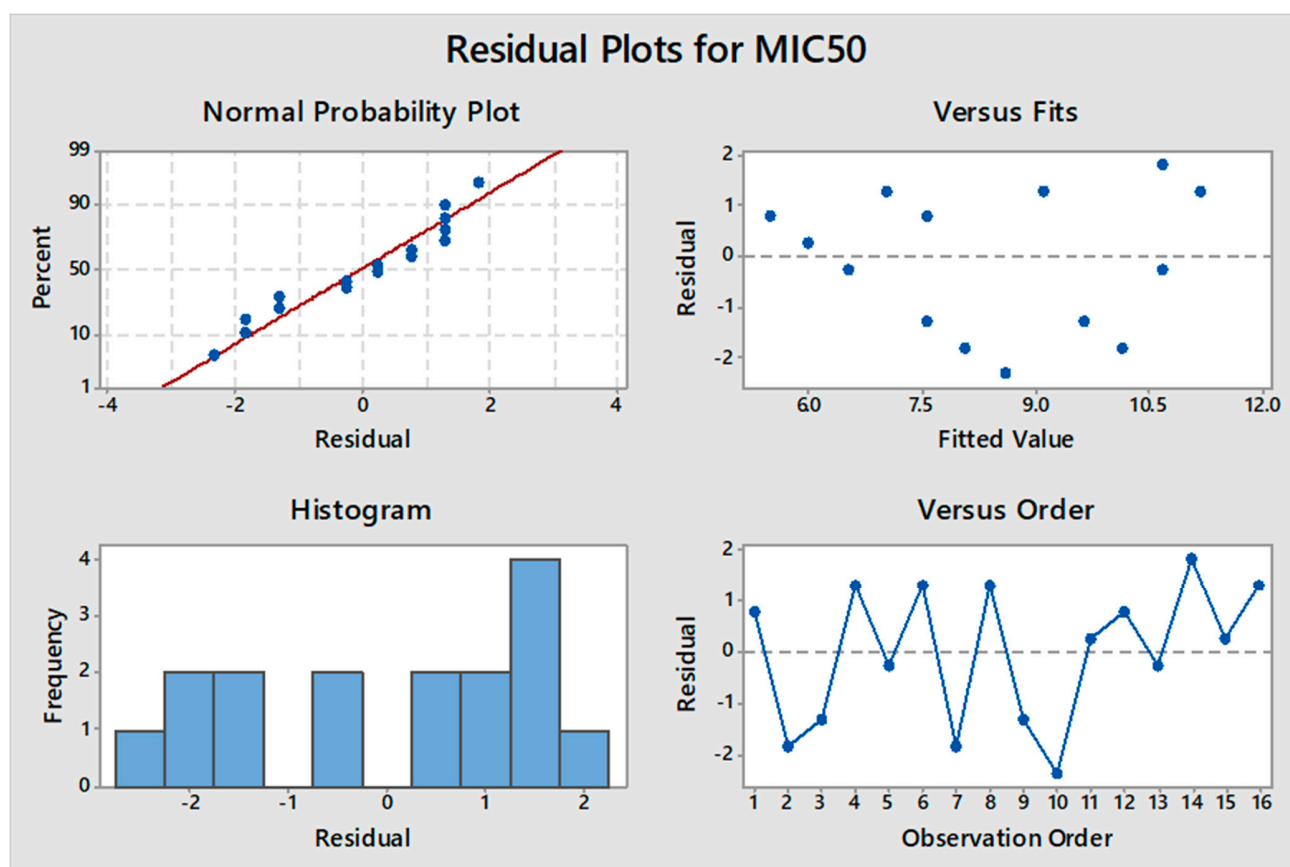

**Figure S14.** Residual plots of the linear regression of polymer blend concentration and MIC<sub>50</sub>.

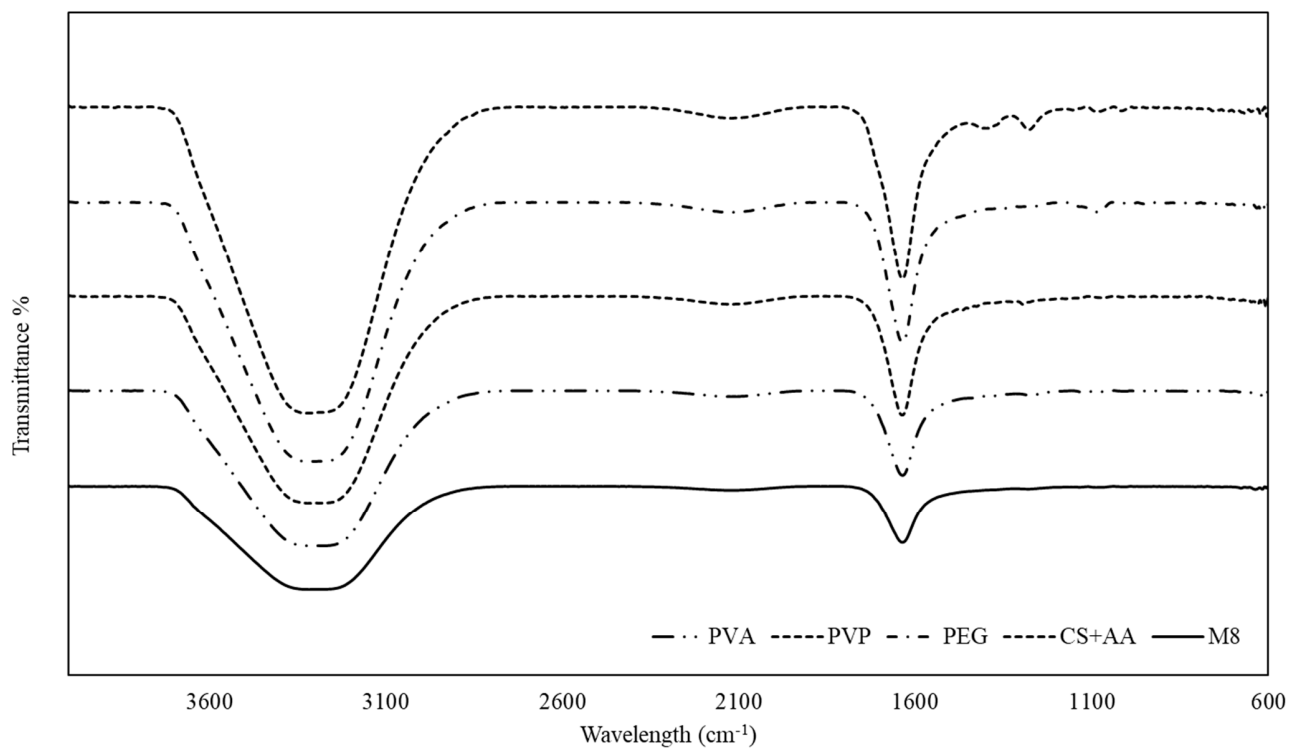

**Figure S15.** FTIR analysis of polymers.

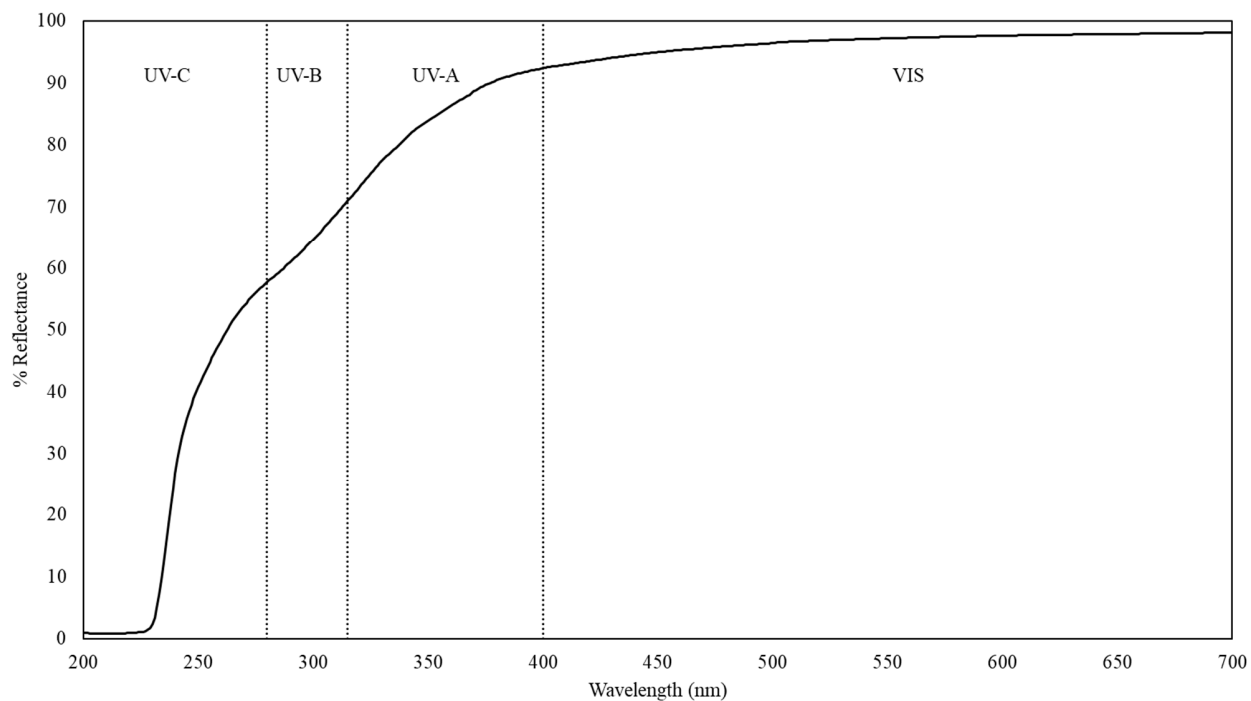

**Figure S16.** Reflectance percentage of M8 from 200 nm to 700 nm.
